1 **Substitutions and codon usage in SARS-CoV-2 in mammals indicate**  
2 **natural selection and host adaptation**

3

4 Zhixiong Lei<sup>1#</sup>, Dan Zhang<sup>1#</sup>, Ruiping Yang<sup>2</sup>, Jian Li<sup>1,2</sup>, Weixing Du<sup>1</sup>, Yanqing Liu<sup>1</sup>,  
5 Huabing Tan<sup>1</sup>, Zhixin Liu<sup>1,2,3\*</sup>, Long Liu<sup>1,2,3\*</sup>

6

7 <sup>1</sup> Department of Infectious Diseases, Renmin Hospital, School of Basic Medical  
8 Sciences, Hubei University of Medicine, Shiyan, China

9 <sup>2</sup> Biomedical Research Institute, Hubei University of Medicine, Shiyan, China

10 <sup>3</sup> Hubei Key Laboratory of Embryonic Stem Cell Research, Hubei University of  
11 Medicine, Shiyan 442000, China

12

13 # These authors contributed equally.

14 \*Correspondence: Long Liu (liulong2015@outlook.com)

15 **Zhixin Liu** (lzx20022456@126.com)

16

17 **Running title:** Substitutions of SARS-COV-2 indicate host adaptation

18 **Word counts for Abstract: 239**

19 **Word counts for Text: 3349**

20

21 **Abstract**

22 The outbreak of COVID-19, caused by severe acute respiratory syndrome coronavirus  
23 2 (SARS-CoV-2) infection, rapidly spread to create a global pandemic and has  
24 continued to spread across hosts from humans to animals, transmitting particularly  
25 effectively in mink. How SARS-CoV-2 evolves in animals and humans and the  
26 differences in the separate evolutionary processes remain unclear. We analyzed the  
27 composition and codon usage bias of SARS-CoV-2 in infected humans and animals.  
28 Compared with other animals, SARS-CoV-2 in mink had the most substitutions. The  
29 substitutions of cytidine in SARS-CoV-2 in mink account for nearly 50% of the  
30 substitutions, while those in other animals represent only 30% of the substitutions.  
31 The incidence of adenine transversion in SARS-CoV-2 in other animals is threefold  
32 higher than that in mink-CoV (the SARS-CoV-2 virus in mink). A synonymous codon  
33 usage analysis showed that SARS-CoV-2 is optimized to adapt in the animals in  
34 which it is currently reported, and all the animals showed decreased adaptability  
35 relative to that of humans, except for mink. A binding affinity analysis indicated that  
36 the spike protein of the SARS-CoV-2 variant in mink showed a greater preference for  
37 binding with the mink receptor ACE2 than with the human receptor, especially as the  
38 mutation Y453F and F486L in mink-CoV lead to improvement of binding affinity for  
39 mink receptor. Our study focuses on the divergence of SARS-CoV-2 genome  
40 composition and codon usage in humans and animals, indicating possible natural  
41 selection and current host adaptation.

42

43

44 **Key words:** SARS-CoV-2, substitution, codon usage, host adaptation, evolution

45

## 46 **Introduction**

47 SARS-CoV-2 is a  $\beta$ -coronavirus that emerged in 2019 and spread worldwide, leading  
48 to an ongoing global pandemic [1,2]. As of February 19<sup>th</sup> 2021, the number of infected  
49 cases reached 110 million, and more than 2.4 million deaths have occurred (Johns  
50 Hopkins University statistics; <https://coronavirus.jhu.edu/map.html>). SARS-CoV-2  
51 has a single-stranded positive-sense RNA genome containing 29,903 nucleotides and  
52 consisting of 11 open reading frames (ORFs) encoding 27 proteins[3]. The S  
53 glycoprotein is a fusion viral protein that functions in recognition of the host receptor  
54 ACE2[4].

55 There is a broad host spectrum because SARS-CoV-2 binds a receptor common to  
56 humans and animals[5]. To date, the following animals have been reported to be  
57 susceptible to infection: cats, dogs, tigers, lions, ferrets, and mink [6-12]. SARS-CoV-2  
58 infection of pets, including cats and dogs [8,10], was the earliest reported animal  
59 infections in the epidemic. Later, in a report on SARS-CoV-2 infection in tigers, lions,  
60 and human keepers in a New York zoo [11], epidemiologic and genomic data  
61 indicated human-to-animal transmission [13]. Other animals, including snow leopards  
62 and gorillas, tested positive for SARS-CoV-2 after showing signs of illness [14,15]. It  
63 is noteworthy that a study from The Netherlands reported the spread of SARS-CoV-2  
64 from humans to mink and from mink back to humans in mink farms [16]. Eighty-eight  
65 mink and 18 staff members from sixteen mink farms were confirmed to be infected  
66 with SARS-CoV-2 as determined by sequence analysis. The adaptation of

67 SARS-CoV-2 to bind the mink receptor and the viral evolution in the mink host are  
68 worthy of further study.

69 Codon usage bias refers to differences in the frequency of occurrence of synonymous  
70 codons during protein translation, which differs between hosts [17]. Viruses differ  
71 markedly in their specificity toward host organisms, and the analysis of the viral  
72 genome structure and composition contributes to the partial understanding of virus  
73 evolution and adaptation in the host [18]. Further exploration of the codon usage  
74 pattern of SARS-CoV-2 in different hosts, especially the codon architecture of the  
75 *Spike* gene, indicate host adaptation related to cross-species transmission.

76 Surveillance of the substitution and selection of the SARS-CoV-2 genome is  
77 important for the study of viral evolution and for tracking viral transmission. In  
78 particular, study of the *Spike* gene helps to evaluate the immunization effect of  
79 vaccinations and to adjust the vaccine design in a timely manner. This study focuses  
80 on the divergence of the SARS-CoV-2 genome composition and codon usage in  
81 human and animal hosts to investigate the natural selection that might play a role in  
82 virus evolution, adaptability, and transmission.

83

## 84 **Materials and Methods**

### 85 **SARS-COV-2 sequences and data collection**

86 A total 207 SARS-COV-2 genome sequences from humans, cats, dogs, tigers, lions,  
87 ferrets, and minks were used for the genetic analysis (The strains information was  
88 recorded in the Supplementary Table S1). All the genomic sequences selected by the  
89 hosts were obtained from the GISAID database (<https://www.gisaid.org/>). Isolate  
90 Wuhan/WIV04 was used as the reference strain.

91

### 92 **Evolutionary analysis**

93 Thirty-nine SARS-COV-2 genomes were used for phylogenetic analysis. The  
94 evolutionary history was inferred by using the Maximum Likelihood method and  
95 Tamura-Nei model [19]. The tree with the highest log likelihood (-42442.50) is shown.  
96 The percentage of trees in which the associated taxa clustered together is shown next  
97 to the branches. Initial tree(s) for the heuristic search were obtained by applying the  
98 Neighbor-Joining method to a matrix of pairwise distances estimated using the  
99 Maximum Composite Likelihood (MCL) approach. A discrete Gamma distribution  
100 was used to model evolutionary rate differences among sites (5 categories (+G,  
101 parameter = 0.0500)). The tree is drawn to scale, with branch lengths measured in the  
102 number of substitutions per site. This analysis involved 39 nucleotide sequences.  
103 There was a total of 29903 positions in the final dataset. Evolutionary analyses were  
104 conducted in MEGA-X [20].

105

## 106 **Identification of mutations**

107 The sequences were aligned using MEGA-X, and the single nucleotide  
108 polymorphisms were analyzed using the SNIPlay pipeline by uploading aligned Fasta  
109 format file ([https://sniplay.southgreen.fr/cgi-bin/analysis\\_v3.cgi](https://sniplay.southgreen.fr/cgi-bin/analysis_v3.cgi))[21]. All the  
110 sequences including coding regions, 5'UTR and 3'UTR were used for the analysis.

111

## 112 **Estimation of nonsynonymous and synonymous substitution rates**

113 The number of nonsynonymous substitutions per synonymous site (dN) and the  
114 number of synonymous substitutions per nonsynonymous site (dS) for each coding  
115 site were calculated using the Nei–Gojobori method (Jukes–Cantor) in MEGA-X. The  
116 Datamonkey adaptive evolution server (<http://www.datamonkey.org>) was used to  
117 identify sites where only some of the branches have undergone selective pressure. The  
118 mixed-effects model of evolution (MEME) and fixed effects likelihood (FEL)  
119 approaches were used to infer the nonsynonymous and synonymous substitution rates.

120

## 121 **Codon usage analysis**

122 The codon adaptation index (CAI) of a given coding sequence was calculated using R  
123 script [22]. A CAI analysis of those coding sequences from different hosts was  
124 performed using DAMBE 5.0 and the CAI [23,24]. The codon usage data of different  
125 hosts were retrieved from the codon usage database (<http://www.kazusa.or.jp/codon/>),

126 and the relative synonymous codon usages (RSCUs) were analyzed using MEGA  
127 software.

128

### 129 **Spike protein sequence and structure reconstruction**

130 The crystal structure of the SARS-CoV-2 receptor-binding domain (RBD) in  
131 complex with human ACE2 (PDB ID: 6M0J) was used for structural analysis.  
132 Structures of ACE2 and the viral spike from mink were constructed by the SWISS  
133 model server (<https://swissmodel.expasy.org/>). Comparisons of the predicted protein  
134 structures and pairwise comparisons were analyzed using PyMOL software.

135

### 136 **Molecular dynamics**

137 For the binding free energy ( $E$ ), we simulated the minimized annealing energy  
138 through molecular dynamics (MD) simulation in YASARA [25]. We performed three  
139 iterations of energy minimization for the set of wild-type residues in the viral spike  
140 protein bound with human ACE2 and mutant residues in the mink-CoV spike with  
141 mink ACE2. The relative binding energy ( $\Delta E$ ) are reported as the mean and standard  
142 deviation values across three replicates.

143

### 144 **Selective coefficient index**

145 The selection coefficient index ( $S$ ) of all SARS-CoV-2 codons was estimated by the  
146 FMutSel0 model in the program CODEML (PAML package) [26], The fitness

147 parameter of the most common residues at each location is fixed to 0, while the other

148 fitness parameters are limited to  $-20 < F < 20$ .

149

#### 150 **Statistical analysis and mapping**

151 Statistical analyses were performed using ANOVA followed by Turkey's post hoc

152 test, and the data were considered significantly different if the p-value was less than

153 0.05. \*\*\* $p < 0.001$ , \*\* $p < 0.01$ , \* $p < 0.05$ . The figures were mapped by the software

154 PRISM GraphPad 5.0.

155



## 156 **Results**

### 157 **Sequence and analysis of SARS-CoV-2 isolated from animals**

158 As of Feb 2<sup>nd</sup> 2021, more than 400 thousand SARS-CoV-2 genome sequences had  
159 been uploaded to the GISAID database. It is important to study the mutation rates and  
160 selective pressures on the SARS-CoV-2 genome during the spread of the epidemic.  
161 The results presented in Fig 1A show that the evolutionary entropy increased at  
162 specific sites in the whole genome of SARS-CoV-2, indicating substitution and  
163 selection capacity at these sites. In addition to humans, SARS-CoV-2 infects other  
164 animals (Fig 1B) and evolves in these animals. A phylogenetic tree was reconstructed  
165 based on animal-derived whole genome consensus sequences compared with the  
166 SARS-CoV-2 human isolate WIV04 (Fig 1C). Most SARS-CoV-2 clade isolates from  
167 the same animal clustered together, and the same clade contained sequences from all  
168 the mink regardless of their geographic region.

169 The cluster of SARS-CoV-2 from mink (mink-CoV) has more substitutions compared  
170 to the reference sequence WIV04 (Supplementary Table S2), and the substitutions of  
171 cytidine in mink-CoV account for nearly 50% of the substitutions, while in other  
172 animals, cytidine accounts for only 30% of the substitutions (Fig 1D). The  
173 substitution of adenine in SARS-CoV-2 in other animals is threefold higher than that  
174 in mink-CoV. To track how the substitutions occurred in the mink-CoV genome, we  
175 recorded all the mutations in the mink-CoV genome in reference to the WIV04  
176 genome. The results in Fig 1E & 1G show that the cytidine-to-uracil transition

177 occurred more than 40% of the time and was eightfold higher than the  
178 uracil-to-cytidine substitution. Notably, the substitutions of guanine and adenine were  
179 more than threefold higher in nonsynonymous mutations than in synonymous  
180 mutations (Fig 1F).

181

### 182 **Mutational spectra of Spike protein in human and animal samples**

183 The evolutionary entropy (Fig 2A) analysis revealed that most of the notable mutation  
184 pressures on the Spike protein occurred primarily in three relatively narrow domains,  
185 the N-terminal domain (NTD, green), receptor binding motif (RBM, purple), SD  
186 (pink), and CH and CD (blue) domains. The variation in the spike gene was evident  
187 when all the included sequences isolated from humans and animals were recorded in  
188 our study, which led to the identification of a number of highly variable residues,  
189 including L18F, A222V, S477N, P681H, S982A and D1118H (Fig 2B and 2C). A total  
190 of 12 relatively high-frequency amino acid variation sites were detected. Except for  
191 D614G, the substitution with the highest frequency was A222V. Notably, sequences in  
192 dogs (EPI 722380) had the most amino acid variant types in animals, and the dog  
193 strains EPI 730652 and EPI 699508, clustered together, contained the A222V and  
194 P681H mutations. C-to-U substitutions were scattered throughout the SARS-CoV-2  
195 genome and accounted for 24.06% of the substitutions in the spike gene in of all  
196 epidemic strains analyzed as of February 2, 2021 (Fig 2D). Because of the widespread  
197 transmission of D614G (GAT>GGT), A-to-G substitutions accounted for 56.12% of

198 all the monitored strains. The result of dN-dS indicates the natural selection for  
199 mutations in these specific sites in the *spike* gene (dN-dS>0 indicates positive  
200 selection, and dN-dS<0 indicates purification selection). Fig 2E shows that sites 222,  
201 262, 439 and 614 were exposed to strong positive selection pressure, while positions  
202 294, 413, 1018 and 1100 were subjected to purifying selection during evolution.

203 CAI was used to quantify the codon usage similarities between different coding  
204 sequences based on a reference set of highly expressed genes [27]. To clarify the  
205 optimization of SARS-CoV-2 in different hosts, we calculated the average CAI of the  
206 SARS-CoV-2 whole genome (Fig 2F) and spike region (Fig 2G).  
207 Interestingly, SARS-CoV-2 in bat hosts has a higher value of CAI relative to  
208 humans, while dogs had an obviously decreased CAI value compared to humans (Fig  
209 2F). The bias of codon usage in the spike mutants are shown in Supplementary Table  
210 S3. Considering codon usage in the spike gene in different hosts, Fig 2G shows that  
211 pangolins, cats, dogs, tigers, and lions all had a lower CAI value than humans. These  
212 results indicated that SARS-CoV-2 optimized codon usage to adapt to the animals in  
213 which infection has been reported, but all of them showed a downward trend in  
214 adaptability relative to humans except for mink.

215

### 216 **Comparison of the receptors and binding affinity between humans and mammals**

217 Recently, Wang et al. reported that the tyrosine-protein kinase receptor (UFO, also  
218 called AXL) is a candidate receptor for SARS-CoV-2 infection of the respiratory

219 system [28]. Here, the interaction of spike with UFO was predicted using the ZDOCK  
220 sever (<http://zdock.umassmed.edu/>) after simulation with the structure of human and  
221 mink UFO. The results showed that the spike interacts with human and mink UFO  
222 through the amino acids Glu56, Glu59, His61, Glu70 and Glu85 (Fig 3B), which form  
223 electric charge attraction and hydrophobic interactions with residues K147, P251,  
224 D253 and N148 on spike. All these residues were located on the NTD of spike (Fig  
225 3A). To distinguish the differentiation of receptor sequences between different  
226 animals and humans, the ACE2 and UFO amino acid sequences in humans, mink,  
227 ferrets, tigers, cats, and dogs were aligned (Fig 3C). The results showed that the  
228 critical mutations H34Y, L79H and G354R appear in mink and ferret ACE2 (Fig 3C  
229 upper), and the variations H61T, I68V and E85G are evident in the UFO sequences of  
230 all the animals except for tigers (Fig 3C lower). On the other hand, viral variation is  
231 another important factor that should also be considered when analyzing infection  
232 differences between animals and humans. Corresponding to the contact residues on  
233 the receptors, alignment of the viral sequence contacts of UFO and ACE2 on spike  
234 indicated that residues binding UFO are conserved (Fig 3D), while residues at site 453,  
235 which interact with those at position 34 in ACE2 (Fig 3E), showed a higher binding  
236 affinity for F453-Y34 in mink and ferrets than for Y453-H34 in humans (Fig 3F). The  
237 interaction of L486- T82 showed increased binding energy in mink and ferrets (Fig  
238 3F). These variations indicate that the SARS-CoV-2 Spike shows a greater preference  
239 for binding the mink receptor ACE2 than human ACE2 after this mutation occurs.

240

241 **Codon usage and mutations in the RBMs of spike proteins in mammals**

242 Amino acid substitutions within the SARS-CoV-2 Spike RBM may have contributed  
243 to host adaption and cross-species transmission. N439K, S477N and N501Y were the  
244 most abundant variations throughout the RBM regions (Fig 4A and 4B). N439 does  
245 not bind directly with ACE2 but functions in the stabilization of the 498–505 loop [29],  
246 but the N439K substitution is absent in animal CoVs (Fig 3D). Previous  
247 computational analysis combined with entropy analysis of the spike (Fig 2A) showed  
248 that S477N may have decreased stability compared with the wild type [30]. Since  
249 human SARS-CoV-2 and mink-CoV do not show very different codon usage bias (Fig  
250 2F) and because viral codon bias depends on the host, we compared the codon usage  
251 frequency of SARS-CoV-2 and SARS-CoV (Fig 4C), for which ferrets are common  
252 hosts. Because substitutions N501T (AAU>ACU) in mink and N501Y (AAU>UAU)  
253 in humans occurred nonsynonymously in the first and second positions and since  
254 these substitutions had a lower frequency than other noted substitutions (Fig 1G &  
255 2D), further study on the relationship of these substitutions is needed. The results of  
256 selective coefficient index in Fig 4D show the differences of relative fitness in the  
257 SARS-CoV-2 codons, CGA and CGG have the high fitness score in all codon-specific  
258 estimates, and T (ACU) has a lower fitness than Y (UAU). In addition to the reported  
259 variation, other important mutations should also be considered in mink and human  
260 prevalent strains, such as Y505H (Fig 4E), which also affect binding with the ACE2

261 receptor and Histidine (CAU) has the similar codon fitness with Tyrosine (UAU) (Fig  
262 4D).

263 In addition to the viral codon adaptation, mutation factors must be considered for  
264 virus prevalence. There was a lot lineages such as B.1.1.7, B.1.351, P.1 and the  
265 recently emerged lineage B.1.617 shared the same mutation sites Asp614 to Gly614 at  
266 spike (Fig 5A & 5B), and the B.1.351, P.1 possess the mutations E484K and N501Y  
267 which own the ability to escape natural and vaccine immunity system and have a  
268 broad prevalence in South Africa and Brazil (Fig 5D and 5E). The recently emerged  
269 lineage B.1.617 in India (Fig 5F) has two key mutations L452R and E484K at the  
270 same time, L452R confer resistance towards RBD-direct antibody and is  
271 characterized by a moderate increase in transmissibility. Increased surveillance needs  
272 to dare and will be crucial for control the epidemic and prevalence.

273

274 **Discussion**

275 Tracking animal variants arising from human contact or produced from animal bodies  
276 is an interesting topic and allows for better understanding of the evolutionary  
277 mechanism and selection fitness of SARS-CoV-2 in the host. Regardless of the  
278 probability of contact between different animals and SARS-CoV-2, the transmission  
279 of the virus between animals is inseparable from susceptibility and host adaptability.  
280 Mink were the first extensively farmed species to be affected by the COVID-19  
281 epidemic, indicating that mustelids, including mink and ferrets, are more sensitive to  
282 SARS-CoV-2 than other animals [31]. Several mink farms in The Netherlands,  
283 Denmark, USA, and Spain all reported infection cases [32-35], indicating  
284 mink-to-mink and mink-to-human (Netherlands, Denmark) transmission. Other  
285 animals, including tigers and lions, are also susceptible to SARS-CoV-2 infection [36].  
286 Hence, comparison of the susceptibility and the natural evolutionary pressure in  
287 different hosts for SARS-CoV-2 is meaningful and helpful for clarifying the host  
288 adaptation mechanisms and monitoring the epidemic.

289 Viral genes and genomes exhibit varying numbers of synonymous codons depending  
290 on the host [37]; hence, the codon usage bias of the virus has a strong relationship with  
291 its host. Studying the preferred synonymous codon usage and base substitutions helps  
292 to provide an understanding of the codon patterns of the virus in relation to their hosts  
293 and in relation to viral genome evolution. The convergence effect of virus codon  
294 preference on the host is widely recognized and is also one of the main natural

295 selection forces for the coevolution of viruses and hosts [18]. In this study, we  
296 compared the codon bias of SARS-CoV-2 in mink with that of SARS-CoV in ferrets.  
297 Residues threonine (T) and tyrosine (Y) had similar codon biases in SARS-CoV-2 and  
298 SARS-CoV (Fig 4C), which both have the capability to infect mink and ferrets. The  
299 N501T variation mostly appeared in mink, while the N501Y mutation present only in  
300 humans cannot be explained from the perspective of codon bias and indicates that  
301 these two variations belong to two separate lineages.

302 The WebLogo diagram in Fig 4C shows that SARS coronaviruses preferentially have  
303 U- or A-ending codons. This is consistent with a previous report [38], and the G or C  
304 nucleotides in the third position of the preferred SARS-CoV-2 codons are not well  
305 represented. This feature may lead to an imbalance in the tRNA pool in infected cells,  
306 resulting in reduced host protein synthesis. The substitution rate of C-to-U was the  
307 highest in most of the reported sequences in animal species (Fig 1D). This may be  
308 because the surrounding context of cytidine in the sequence strongly influences the  
309 possibility of its mutation to U [39]. In the mink sequences, we observed an 8-fold  
310 increase in C-to-U substitution compared with the U-to-C substitution, which was  
311 higher than the reported 3.5-fold increase in mink [34], suggesting host adaptation of  
312 SARS-CoV-2 in mink over time and the ongoing outbreaks in multiple mink farms. In  
313 mink, the variations in G and A with nonsynonymous substitutions were higher than  
314 those with synonymous substitutions, which needs to be further analyzed. In addition,



315 the sequences of other animal-CoVs are limited, such as those in the dogs and lions in  
316 the GISAID database, which is a limiting factor for comparison of base substitutions.  
317 CAI was used to measure the synonymous codon similarities between the virus and  
318 host coding sequences. For each animal source of the SARS-CoV-2 sequence, we  
319 calculated the average genome and *spike* gene values in the CAI (Fig 2F & 2G).  
320 Bat-CoV (RaTG13) and SARS-CoV-2 (from humans) had higher CAI values, which  
321 indicates that the viruses adapt to their hosts (bat and human) with optimized or  
322 preferred chosen codons, while the dog source of SARS-CoV-2 had lower CAI values,  
323 suggesting that SARS-CoV-2 adapts to dogs with random codons. This finding was  
324 consistent with the conclusion that, compared to dogs, humans are favored hosts for  
325 adaptation [40]. The whole genome or spike sequence in mink-CoV had a similar  
326 substitution level to human SARS-CoV-2, pointing to the ongoing adaptation of  
327 SARS-CoV-2 to the new host and using the preferred chosen codons.  
328 The spike protein is critical for virus infection and host adaptation. We observed that  
329 three nonsynonymous mutations in the RBM domain, Y453F, F486L and N501T,  
330 independently emerged but were rarely observed in human lineages; these residues are  
331 directly involved in contact with the surface of the S-ACE2 complex and therefore are  
332 relevant to new-host adaptation. Other mutations within the RBM domain should also  
333 be monitored to prevent viral transmission and to further track the source. In addition  
334 to the mutation of the RBD, variations in the cell epitope of the spike protein should

335 also be considered, and monitoring of the potential consequences of cell epitope  
336 variations in the process of viral transmission helps to adjust the vaccine strategy.

337

### 338 **Conclusions**

339 Tracking animal variants arising from human contact or produced from animal  
340 bodies is an interesting topic and allows for better understanding of the evolutionary  
341 mechanism and selection fitness of SARS-CoV-2 in the host. Regardless of the  
342 probability of contact between different animals and SARS-CoV-2, the transmission  
343 of the virus between animals is inseparable from susceptibility and host adaptability.  
344 In this study, we systematically contrasted the position substitutions and codon usage  
345 of SARS-CoV-2 in human and animals, including dog, cat, lion, tiger and mink,  
346 showed the decreased adaptability of SARS-CoV-2 in animals relative to humans,  
347 except for mink. SARS-CoV-2 variant in mink showed a greater preference for  
348 binding with the mink receptor. This study focuses on the divergence of SARS-CoV-2  
349 genome composition and codon usage in humans and animals, indicating possible  
350 natural selection and current host adaptation.

351

352

353 **DATA AVAILABILITY STATEMENT**

354 All datasets presented in this study are included in the article/supplementary  
355 material.

356

357

358 **AUTHOR CONTRIBUTIONS**

359 ZXL, DZ, RPY and FZ contributed to the design of experiments. ZXL, DZ, RPY,  
360 FZ, SRY, JJR and ZXL contributed to the conduction of experiments. ZXL, DZ, RPY,  
361 FZ, and JL contributed to the reagents. JL, WXD and ZXL contributed to the analyses  
362 of the data. LL and ZXL contributed to the writing the paper. LL contributed to the  
363 editing the paper.

364

365

366 **FUNDING**

367 This work was supported by Natural Science Foundation of China (82002149 and  
368 81902066), Foundation of Health Commission of Hubei Province (WJ2021M059),  
369 and the COVID-19 Epidemic Emergency Research Foundation (2020XGFYZR07 and  
370 2020XGFYZR08). The funder has no function in the study design, data collection and  
371 analysis, manuscript writing and submission.

372

373

374

375 **References**

- 376 1. Zhu, N.; Zhang, D.; Wang, W.; Li, X.; Yang, B.; Song, J.; Zhao, X.; Huang, B.;  
377 Shi, W.; Lu, R.; et al. A Novel Coronavirus from Patients with Pneumonia in  
378 China, 2019. *N Engl J Med* **2020**, doi:10.1056/NEJMoa2001017.
- 379 2. Zhou, P.; Yang, X.L.; Wang, X.G.; Hu, B.; Zhang, L.; Zhang, W.; Si, H.R.;  
380 Zhu, Y.; Li, B.; Huang, C.L.; et al. A pneumonia outbreak associated with a  
381 new coronavirus of probable bat origin. *Nature* **2020**,  
382 doi:10.1038/s41586-020-2012-7.
- 383 3. Chan, J.F.; Kok, K.H.; Zhu, Z.; Chu, H.; To, K.K.; Yuan, S.; Yuen, K.Y.  
384 Genomic characterization of the 2019 novel human-pathogenic coronavirus  
385 isolated from a patient with atypical pneumonia after visiting Wuhan. *Emerg*  
386 *Microbes Infect* **2020**, *9*, 221-236, doi:10.1080/22221751.2020.1719902.
- 387 4. Letko, M.; Marzi, A.; Munster, V. Functional assessment of cell entry and  
388 receptor usage for SARS-CoV-2 and other lineage B betacoronaviruses. *Nat*  
389 *Microbiol* **2020**, *5*, 562-569, doi:10.1038/s41564-020-0688-y.
- 390 5. Conceicao, C.; Thakur, N.; Human, S.; Kelly, J.T.; Logan, L.; Bialy, D.; Bhat,  
391 S.; Stevenson-Leggett, P.; Zagrajek, A.K.; Hollinghurst, P.; et al. The  
392 SARS-CoV-2 Spike protein has a broad tropism for mammalian ACE2  
393 proteins. *PLoS biology* **2020**, *18*, e3001016,  
394 doi:10.1371/journal.pbio.3001016.
- 395 6. Kim, Y.I.; Kim, S.G.; Kim, S.M.; Kim, E.H.; Park, S.J.; Yu, K.M.; Chang, J.H.;  
396 Kim, E.J.; Lee, S.; Casel, M.A.B.; et al. Infection and Rapid Transmission of  
397 SARS-CoV-2 in Ferrets. *Cell host & microbe* **2020**, *27*, 704-709 e702,  
398 doi:10.1016/j.chom.2020.03.023.
- 399 7. Shi, J.; Wen, Z.; Zhong, G.; Yang, H.; Wang, C.; Huang, B.; Liu, R.; He, X.;  
400 Shuai, L.; Sun, Z.; et al. Susceptibility of ferrets, cats, dogs, and other  
401 domesticated animals to SARS-coronavirus 2. *Science* **2020**, *368*, 1016-1020,  
402 doi:10.1126/science.abb7015.
- 403 8. Sit, T.H.C.; Brackman, C.J.; Ip, S.M.; Tam, K.W.S.; Law, P.Y.T.; To, E.M.W.;  
404 Yu, V.Y.T.; Sims, L.D.; Tsang, D.N.C.; Chu, D.K.W.; et al. Infection of dogs  
405 with SARS-CoV-2. *Nature* **2020**, *586*, 776-778,  
406 doi:10.1038/s41586-020-2334-5.
- 407 9. Zhang, Q.; Zhang, H.; Gao, J.; Huang, K.; Yang, Y.; Hui, X.; He, X.; Li, C.;  
408 Gong, W.; Zhang, Y.; et al. A serological survey of SARS-CoV-2 in cat in  
409 Wuhan. *Emerg Microbes Infect* **2020**, *9*, 2013-2019,  
410 doi:10.1080/22221751.2020.1817796.
- 411 10. Zhang, Q.; Zhang, H.; Huang, K.; Yang, Y.; Hui, X.; Gao, J.; He, X.; Li, C.;  
412 Gong, W.; Zhang, Y.; et al. SARS-CoV-2 neutralizing serum antibodies in cats:  
413 a serological investigation. *bioRxiv* **2020**, 2020.2004.2001.021196,  
414 doi:10.1101/2020.04.01.021196.

- 415 11. McAloose, D.; Laverack, M.; Wang, L.; Killian, M.L.; Caserta, L.C.; Yuan, F.;  
416 Mitchell, P.K.; Queen, K.; Mauldin, M.R.; Cronk, B.D.; et al. From People to  
417 Panthera: Natural SARS-CoV-2 Infection in Tigers and Lions at the Bronx  
418 Zoo. *mBio* **2020**, *11*, doi:10.1128/mBio.02220-20.
- 419 12. Oreshkova, N.; Molenaar, R.J.; Vreman, S.; Harders, F.; Oude Munnink, B.B.;  
420 Hakze-van der Honing, R.W.; Gerhards, N.; Tolsma, P.; Bouwstra, R.;  
421 Sikkema, R.S.; et al. SARS-CoV-2 infection in farmed minks, the Netherlands,  
422 April and May 2020. *Euro surveillance : bulletin Europeen sur les maladies*  
423 *transmissibles = European communicable disease bulletin* **2020**, *25*,  
424 doi:10.2807/1560-7917.Es.2020.25.23.2001005.
- 425 13. Wang, L.; Mitchell, P.K.; Calle, P.P.; Bartlett, S.L.; McAloose, D.; Killian,  
426 M.L.; Yuan, F.; Fang, Y.; Goodman, L.B.; Fredrickson, R.; et al. Complete  
427 Genome Sequence of SARS-CoV-2 in a Tiger from a U.S. Zoological  
428 Collection. *Microbiol Resour Announc* **2020**, *9*, doi:10.1128/MRA.00468-20.
- 429 14. DALY, N. Several gorillas test positive for COVID-19 at California zoo—first  
430 in the world. **2021**.
- 431 15. Andrew, S. Three snow leopards test positive for coronavirus, making it the  
432 sixth confirmed animal species. **2021**.
- 433 16. Molenaar, R.J.; Vreman, S.; Hakze-van der Honing, R.W.; Zwart, R.; de Rond,  
434 J.; Weesendorp, E.; Smit, L.A.M.; Koopmans, M.; Bouwstra, R.; Stegeman, A.;  
435 et al. Clinical and Pathological Findings in SARS-CoV-2 Disease Outbreaks in  
436 Farmed Mink (*Neovison vison*). *Vet Pathol* **2020**, *57*, 653-657,  
437 doi:10.1177/0300985820943535.
- 438 17. Chaney, J.L.; Clark, P.L. Roles for Synonymous Codon Usage in Protein  
439 Biogenesis. *Annu Rev Biophys* **2015**, *44*, 143-166,  
440 doi:10.1146/annurev-biophys-060414-034333.
- 441 18. Bahir, I.; Fromer, M.; Prat, Y.; Linial, M. Viral adaptation to host: a  
442 proteome-based analysis of codon usage and amino acid preferences. *Mol Syst*  
443 *Biol* **2009**, *5*, 311, doi:10.1038/msb.2009.71.
- 444 19. Tamura, K.; Nei, M. Estimation of the number of nucleotide substitutions in  
445 the control region of mitochondrial DNA in humans and chimpanzees. *Mol*  
446 *Biol Evol* **1993**, *10*, 512-526, doi:10.1093/oxfordjournals.molbev.a040023.
- 447 20. Kumar, S.; Stecher, G.; Li, M.; Knyaz, C.; Tamura, K. MEGA X: Molecular  
448 Evolutionary Genetics Analysis across Computing Platforms. *Mol Biol Evol*  
449 **2018**, *35*, 1547-1549, doi:10.1093/molbev/msy096.
- 450 21. Dereeper, A.; Nicolas, S.; Le Cunff, L.; Bacilieri, R.; Doligez, A.; Peros, J.P.;  
451 Ruiz, M.; This, P. SNiPlay: a web-based tool for detection, management and  
452 analysis of SNPs. Application to grapevine diversity projects. *BMC*  
453 *Bioinformatics* **2011**, *12*, 134, doi:10.1186/1471-2105-12-134.
- 454 22. Sharp, P.M.; Li, W.H. The codon Adaptation Index--a measure of directional  
455 synonymous codon usage bias, and its potential applications. *Nucleic acids*  
456 *research* **1987**, *15*, 1281-1295, doi:10.1093/nar/15.3.1281.

- 457 23. Puigbo, P.; Bravo, I.G.; Garcia-Vallve, S. CAIcal: a combined set of tools to  
458 assess codon usage adaptation. *Biol Direct* **2008**, *3*, 38,  
459 doi:10.1186/1745-6150-3-38.
- 460 24. Xia, X. DAMBE5: a comprehensive software package for data analysis in  
461 molecular biology and evolution. *Mol Biol Evol* **2013**, *30*, 1720-1728,  
462 doi:10.1093/molbev/mst064.
- 463 25. Land, H.; Humble, M.S. YASARA: A Tool to Obtain Structural Guidance in  
464 Biocatalytic Investigations. *Methods Mol Biol* **2018**, *1685*, 43-67,  
465 doi:10.1007/978-1-4939-7366-8\_4.
- 466 26. Yang, Z.; Nielsen, R. Mutation-selection models of codon substitution and  
467 their use to estimate selective strengths on codon usage. *Mol Biol Evol* **2008**,  
468 *25*, 568-579, doi:10.1093/molbev/msm284.
- 469 27. Henry, I.; Sharp, P.M. Predicting gene expression level from codon usage bias.  
470 *Mol Biol Evol* **2007**, *24*, 10-12, doi:10.1093/molbev/msl148.
- 471 28. Wang, S.; Qiu, Z.; Hou, Y.; Deng, X.; Xu, W.; Zheng, T.; Wu, P.; Xie, S.; Bian,  
472 W.; Zhang, C.; et al. AXL is a candidate receptor for SARS-CoV-2 that  
473 promotes infection of pulmonary and bronchial epithelial cells. *Cell Res* **2021**,  
474 *31*, 126-140, doi:10.1038/s41422-020-00460-y.
- 475 29. Li, F.; Li, W.; Farzan, M.; Harrison, S.C. Structure of SARS coronavirus spike  
476 receptor-binding domain complexed with receptor. *Science* **2005**, *309*,  
477 1864-1868, doi:10.1126/science.1116480.
- 478 30. Mathavan, S.; Kumar, S. Evaluation of the Effect of D614g, N501y and S477n  
479 Mutation in Sars-Cov-2 through Computational Approach. **2020**,  
480 doi:10.20944/preprints202012.0710.v1.
- 481 31. Manes, C.; Gollakner, R.; Capua, I. Could Mustelids spur COVID-19 into a  
482 panzootic? *Vet Ital* **2020**, *56*, 65-66, doi:10.12834/VetIt.2375.13627.1.
- 483 32. Jo, W.K.; de Oliveira-Filho, E.F.; Rasche, A.; Greenwood, A.D.; Osterrieder,  
484 K.; Drexler, J.F. Potential zoonotic sources of SARS-CoV-2 infections.  
485 *Transbound Emerg Dis* **2020**, doi:10.1111/tbed.13872.
- 486 33. Opriessnig, T.; Huang, Y.W. Further information on possible animal sources  
487 for human COVID-19. *Xenotransplantation* **2020**, *27*, e12651,  
488 doi:10.1111/xen.12651.
- 489 34. Oude Munnink, B.B.; Sikkema, R.S.; Nieuwenhuijse, D.F.; Molenaar, R.J.;  
490 Munger, E.; Molenkamp, R.; van der Spek, A.; Tolsma, P.; Rietveld, A.;  
491 Brouwer, M.; et al. Transmission of SARS-CoV-2 on mink farms between  
492 humans and mink and back to humans. *Science* **2021**, *371*, 172-177,  
493 doi:10.1126/science.abe5901.
- 494 35. Mahdy, M.A.A.; Younis, W.; Ewaida, Z. An Overview of SARS-CoV-2 and  
495 Animal Infection. *Front Vet Sci* **2020**, *7*, 596391,  
496 doi:10.3389/fvets.2020.596391.
- 497 36. Csiszar, A.; Jakab, F.; Valencak, T.G.; Lanszki, Z.; Toth, G.E.; Kemenesi, G.;  
498 Tarantini, S.; Fazekas-Pongor, V.; Ungvari, Z. Companion animals likely do

- 499 not spread COVID-19 but may get infected themselves. *Geroscience* **2020**, *42*,  
500 1229-1236, doi:10.1007/s11357-020-00248-3.
- 501 37. Lloyd, A.T.; Sharp, P.M. Evolution of codon usage patterns: the extent and  
502 nature of divergence between *Candida albicans* and *Saccharomyces cerevisiae*.  
503 *Nucleic acids research* **1992**, *20*, 5289-5295, doi:10.1093/nar/20.20.5289.
- 504 38. Alonso, A.M.; Diambra, L. SARS-CoV-2 Codon Usage Bias Downregulates  
505 Host Expressed Genes With Similar Codon Usage. *Front Cell Dev Biol* **2020**,  
506 *8*, 831, doi:10.3389/fcell.2020.00831.
- 507 39. Simmonds, P. Rampant C->U Hypermutation in the Genomes of  
508 SARS-CoV-2 and Other Coronaviruses: Causes and Consequences for Their  
509 Short- and Long-Term Evolutionary Trajectories. *mSphere* **2020**, *5*,  
510 doi:10.1128/mSphere.00408-20.
- 511 40. Dutta, R.; Buragohain, L.; Borah, P. Analysis of codon usage of severe acute  
512 respiratory syndrome corona virus 2 (SARS-CoV-2) and its adaptability in dog.  
513 *Virus research* **2020**, *288*, 198113, doi:10.1016/j.virusres.2020.198113.
- 514

515 **Figure Legends**

516 **Fig 1. Composition and substitution analysis of SARS-CoV-2 isolated from**

517 **animals.** (A) The evolutionary entropy of specific sites on the SARS-CoV-2 genome

518 in all the GISAID sequences on February 1, 2021. (B) The reported animals infected

519 with SARS-CoV-2 and the defined transmission route from human to animal. (C)

520 Phylogenetic tree using the maximum likelihood method and Tamura-Nei model

521 performed by MEGA-X. The tree was provided with 500 bootstraps. (D) The

522 proportions of uracil, guanine, thymine, and cytidine substitutions (nonsynonymous)

523 in mink SARS-CoV-2 and other animals were separately counted. (E) Base pair

524 changes observed in the mink SARS-CoV-2 genomes. All transitions and

525 transversions were recorded and analyzed (see Supplementary Table S2). (F) The

526 synonymous and nonsynonymous substitutions of mink-CoV were counted and

527 analyzed. (G) The relative proportions of all transitions and transversions were

528 separately analyzed.

529

530

531 **Fig 2. The mutation spectra of the spike protein and the selection pressure.** (A)

532 The evolutionary entropy of specific sites on the spike protein from all the GISAID

533 sequences on February 1, 2021. (B) The WebLogo plots summarize the amino acid

534 divergence of Spike sequences characterized in this study. The single letter amino acid

535 (aa) code is used with the vertical height of the amino acid representing its prevalence



536 at each position in the polypeptide (aa 18, 222, 477, 501, 570, 614, 982 and 1118 are  
537 indicated). (C) Total mutations of the Spike in the variants were recorded and counted  
538 after analysis by MEGA-X software. The frequency was calculated using the  
539 Datamonkey server. (D) The substitutions in the animal viral genome in this study  
540 were analyzed, including uracil, guanine, thymine, and cytidine as substituted with  
541 other bases. (E) The dN-dS value was calculated using the Datamonkey tool. (F) The  
542 genomic CAI value was calculated using SARS-CoV-2 sequences in humans and  
543 animals. Bat-CoV refers to RaTG13 and the corresponding host (bat), other  
544 animal-CoV means SARS-CoV-2 isolated from the indicted animals, the first  
545 SARS-CoV-2 refers the human host. (G) The CAI value of spike sequences in  
546 SARS-CoV-2 in humans and animals.

547

548

549 **Fig 3. Receptors and binding analysis of animals and host adaptation.** (A)  
550 Receptors ACE2 and UFO interacted with the SARS-CoV-2 Spike in different regions.  
551 (B) Human and mink UFO interacted with the SARS-CoV-2 NTD by hydrogen  
552 bonding. The human UFO is colored green, and the mink UFO is cyan. (C)  
553 Alignments of receptors ACE2 (upper) and UFO (lower) in humans and animals. The  
554 single letter amino acid (aa) that functions in the spatial interaction is indicated. (D)  
555 Alignment of the SARS-CoV-2 RBD sequences in humans and in animals reported to  
556 have been infected. The residues in contact with UFO (former) and ACE2 (latter) are

557 indicated. (E) Results of the comparison of the spike structure from mink-CoV with  
558 the reference strain WIV04. Visualization of the changed residues within mink-CoV  
559 are shown as colored balls. (F) The binding free energy of the wild-type spike RBD  
560 with the human receptor and the mutant spike RBD with the mink receptor.

561

562

563 **Fig 4. Codon usage and RBM mutations of the spike protein.** (A) Total mutations  
564 of the RBM variants were recorded and counted after analysis by MEGA-X software.  
565 The frequency was calculated using the Datamonkey server. (B) The WebLogo plots  
566 summarize the amino acid divergence of RBM sequences from humans and mink. The  
567 single letter amino acid code is used with the vertical height of the amino acid  
568 representing its prevalence at each position in the polypeptide. (C) The synonymous  
569 codon usage bias of SARS-CoV-2 was produced by WebLogo  
570 (<https://weblogo.berkeley.edu/logo.cgi>), comparing the mink SARS-CoV-2 sequence  
571 MT396266 (GenBank ID) with SARS-CoV strain Toronto-2. (D) All codon-specific  
572 estimates of selective coefficient index were calculated, the indicated mutant codons  
573 of N501 were marked in blue, and the highest fitness codons were colored in red. (E)  
574 The variations Y505H in mink- or human-prevalent strains are also involved with  
575 binding to receptor ACE2.

576

577

578 **Fig 5. The prevalence of main lineages during the outbreak to April 2021.** (A) The  
579 main characteristic lineages B.1.1.7, B.1.351, P.1 and B.1.617. (B) The mutations in  
580 RBD region of spike protein. (C) The prevalence of lineage B.1.1.7 in UK. (D) The  
581 prevalence of lineage B.1.351 in South Africa. (E) The prevalence of lineage P.1 in  
582 Brazil. (F) The prevalence of lineage B.1.617 in India.  
583

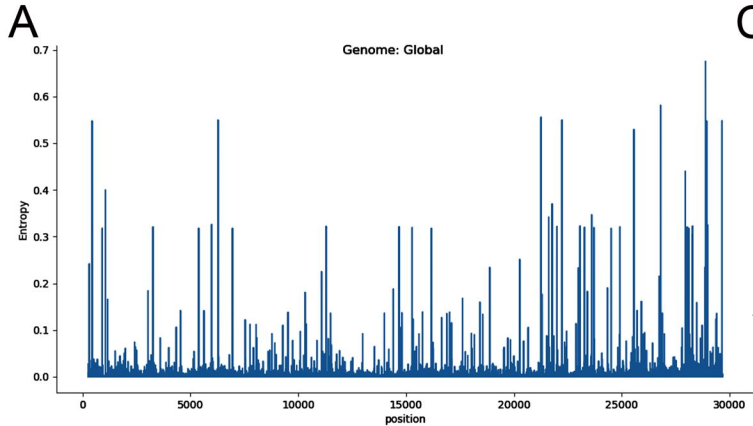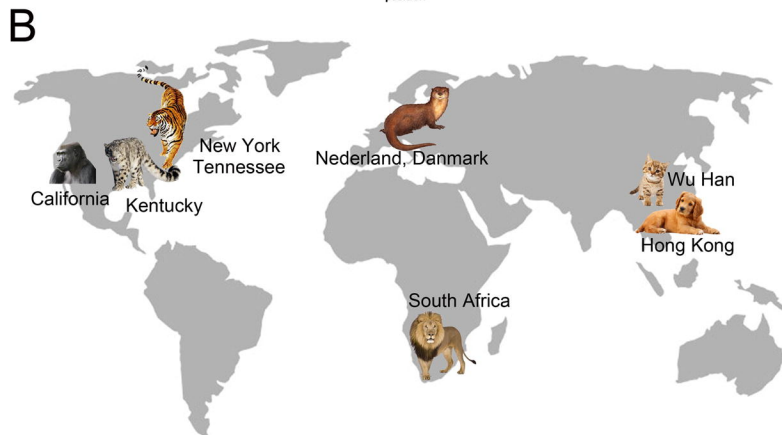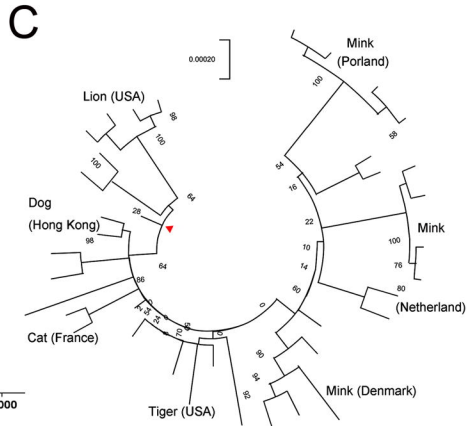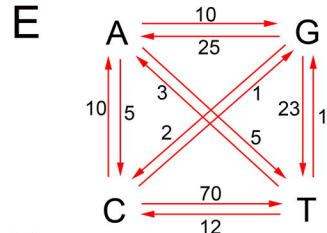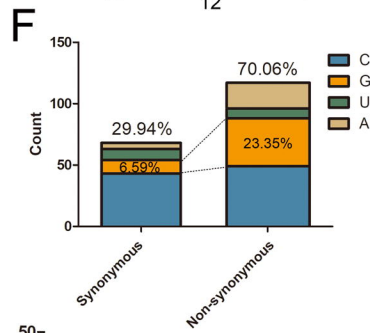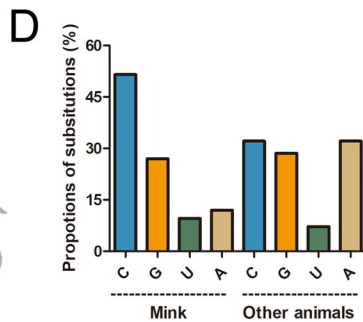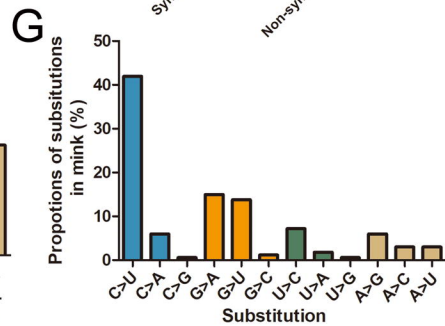

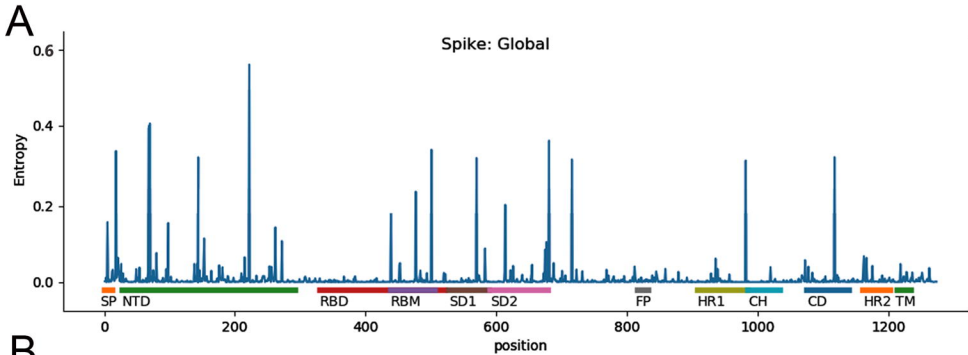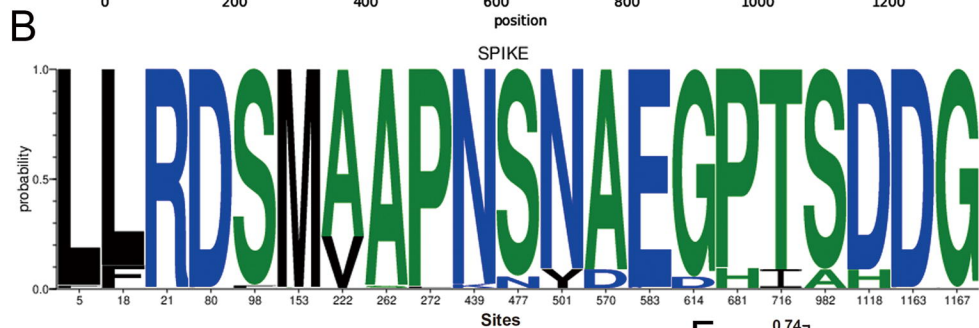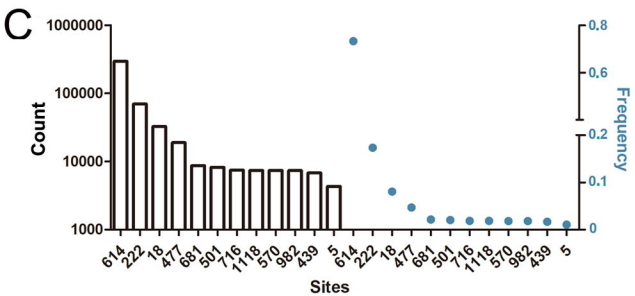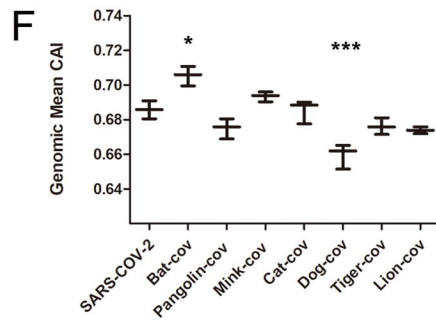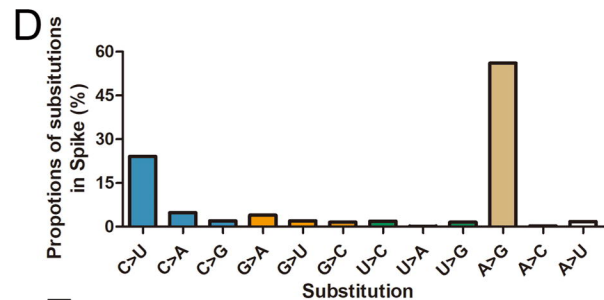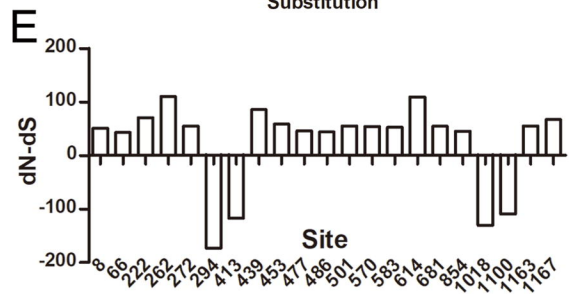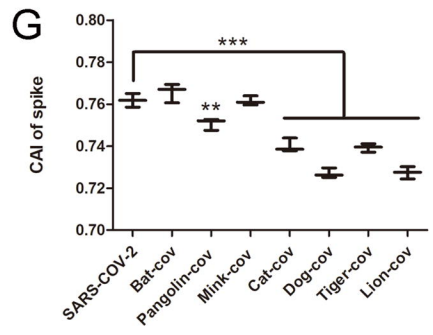

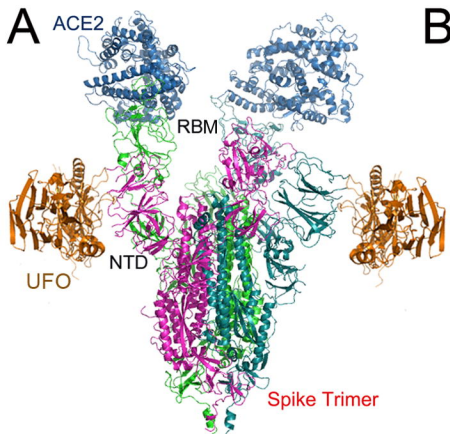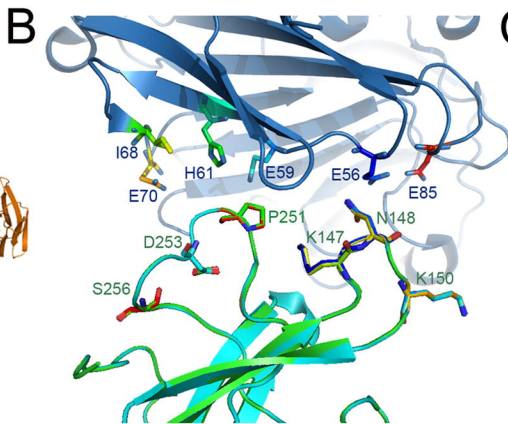

**C**

|                                   |   | 34 | 38 | 41 |    | 79 | 82 |   | 354 | 357 |
|-----------------------------------|---|----|----|----|----|----|----|---|-----|-----|
| Species/Abbrv                     |   | *  | ** | *  | ** | *  | ** | * | **  | **  |
| 1. Q9BYF1.2 Homo sapiens          | N | H  | E  | A  | E  | D  | L  | F | Y   | Q   |
| 2. QPL12211.1 Neovison vison      | N | Y  | E  | A  | E  | B  | L  | S | Y   | Q   |
| 3. BAB53380.1 Mustela putorius    | N | Y  | E  | A  | E  | B  | L  | S | Y   | Q   |
| 4. QNC68911.1 Mustela lutreola    | N | Y  | E  | A  | E  | B  | L  | S | Y   | Q   |
| 5. XP_007090142.1 Panthera tigris | L | A  | E  | T  | P  | L  | E  | L | A   | E   |
| 6. Q56H28.1 Felis catus           | N | H  | E  | A  | E  | B  | L  | S | Y   | Q   |
| 7. ACT66277.1 Canis lupus fam     | N | Y  | E  | A  | E  | B  | L  | S | Y   | Q   |

  

|                              |   | 56 | 59 | 61 |   | 68 | 70 |   | 85 |
|------------------------------|---|----|----|----|---|----|----|---|----|
| Species/Abbrv                |   | *  | *  | *  | * | *  | *  | * | *  |
| 1. sp F30530.4  Homo sapiens | G | E  | P  | P  | E | V  | H  | L | R  |
| 2. CCP76871.1 Neovison vison | G | E  | P  | P  | E | V  | T  | W | L  |
| 3. XP_004776133.1 Mustela pu | G | E  | P  | P  | E | V  | T  | W | L  |
| 4. XP_015393107.1 Panthera t | Q | D  | I  | A  | V | I  | S  | W | K  |
| 5. XP_023101710.1 Felis catu | G | E  | P  | P  | E | V  | T  | W | L  |
| 6. XP_038301305.1 Canis lupu | G | E  | P  | P  | E | V  | T  | W | L  |

**D**

|                          |   | 147 | 150 |   | 251 | 253 | 256 |   | 439 | 453 | 456 |   | 486 | 493 |   | 501 | 505 |
|--------------------------|---|-----|-----|---|-----|-----|-----|---|-----|-----|-----|---|-----|-----|---|-----|-----|
| Species/Abbrv            |   | *   | *   | * | *   | *   | *   | * | *   | *   | *   | * | *   | *   | * | *   | *   |
| 1. hCoV-19/Wuhan/IPBCAM  | V | Y   | H   | K | N   | N   | K   | S | M   | Y   | L   | T | P   | C   | D | S   | S   |
| 2. hCoV-19/mink/Denmark  | V | Y   | H   | K | N   | N   | K   | S | M   | Y   | L   | T | P   | C   | D | S   | S   |
| 3. hCoV-19/mink/Denmark  | V | Y   | H   | K | N   | N   | K   | S | M   | Y   | L   | T | P   | C   | D | S   | S   |
| 4. hCoV-19/mink/Denmark  | V | Y   | H   | K | N   | N   | K   | S | M   | Y   | L   | T | P   | C   | D | S   | S   |
| 5. hCoV-19/mink/Denmark  | V | Y   | H   | K | N   | N   | K   | S | M   | Y   | L   | T | P   | C   | D | S   | S   |
| 6. hCoV-19/cat/Greece/k  | V | Y   | H   | K | N   | N   | K   | S | M   | Y   | L   | T | P   | C   | D | S   | S   |
| 7. hCoV-19/cat/France//  | V | Y   | H   | K | N   | N   | K   | S | M   | Y   | L   | T | P   | C   | D | S   | S   |
| 8. hCoV-19/cat/Denmarkk  | V | Y   | H   | K | N   | N   | K   | S | M   | Y   | L   | T | P   | C   | D | S   | S   |
| 9. hCoV-19/tiger/USA/NN  | V | Y   | H   | K | N   | N   | K   | S | M   | Y   | L   | T | P   | C   | D | S   | S   |
| 10. hCoV-19/tiger/USA/N  | V | Y   | H   | K | N   | N   | K   | S | M   | Y   | L   | T | P   | C   | D | S   | S   |
| 11. hCoV-19/tiger/USA/N  | V | Y   | H   | K | N   | N   | K   | S | M   | Y   | L   | T | P   | C   | D | S   | S   |
| 12. hCoV-19/tiger/USA/N  | V | Y   | H   | K | N   | N   | K   | S | M   | Y   | L   | T | P   | C   | D | S   | S   |
| 13. hCoV-19/dog/Hong Kon | V | Y   | H   | K | N   | N   | K   | S | M   | Y   | L   | T | P   | C   | D | S   | S   |
| 14. hCoV-19/mink/Poland  | V | Y   | H   | K | N   | N   | K   | S | M   | Y   | L   | T | P   | C   | D | S   | S   |
| 15. hCoV-19/mink/Poland  | V | Y   | H   | K | N   | N   | K   | S | M   | Y   | L   | T | P   | C   | D | S   | S   |
| 16. hCoV-19/mink/Poland  | V | Y   | H   | K | N   | N   | K   | S | M   | Y   | L   | T | P   | C   | D | S   | S   |
| 17. hCoV-19/mink/Poland  | V | Y   | H   | K | N   | N   | K   | S | M   | Y   | L   | T | P   | C   | D | S   | S   |
| 18. hCoV-19/mink/Nether  | V | Y   | H   | K | N   | N   | K   | S | M   | Y   | L   | T | P   | C   | D | S   | S   |
| 19. hCoV-19/mink/Denmar  | V | Y   | H   | K | N   | N   | K   | S | M   | Y   | L   | T | P   | C   | D | S   | S   |
| 20. hCoV-19/mink/Denmar  | V | Y   | H   | K | N   | N   | K   | S | M   | Y   | L   | T | P   | C   | D | S   | S   |

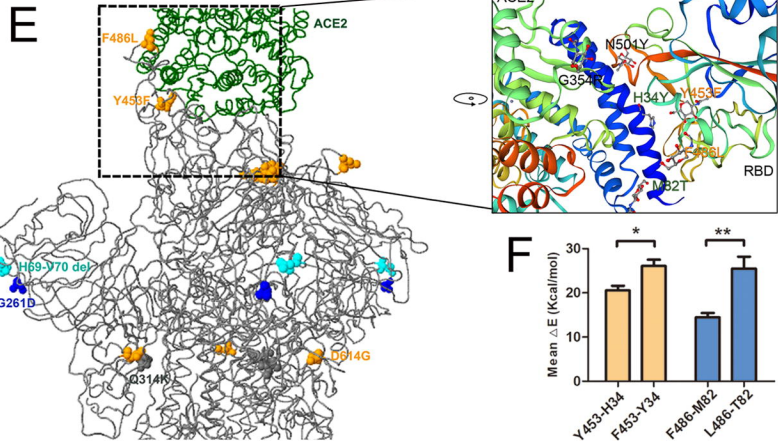

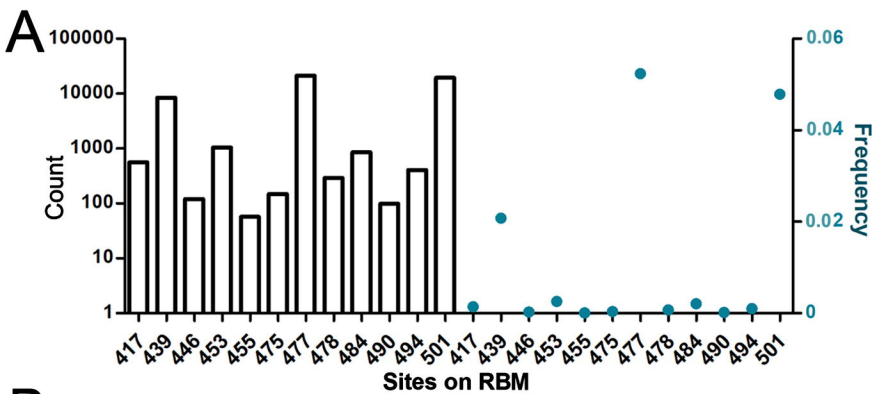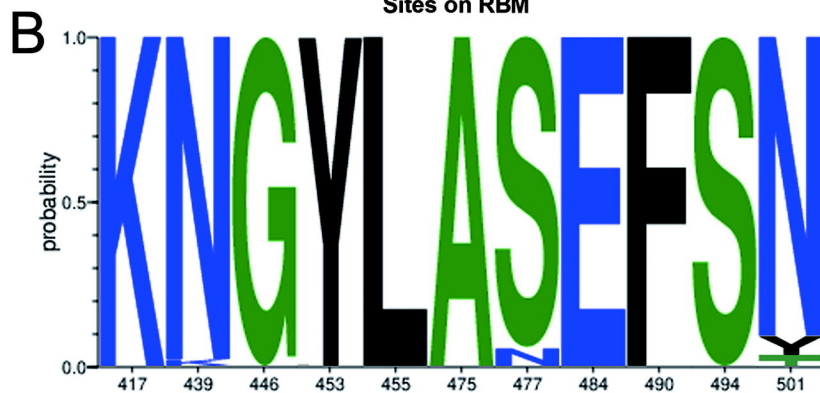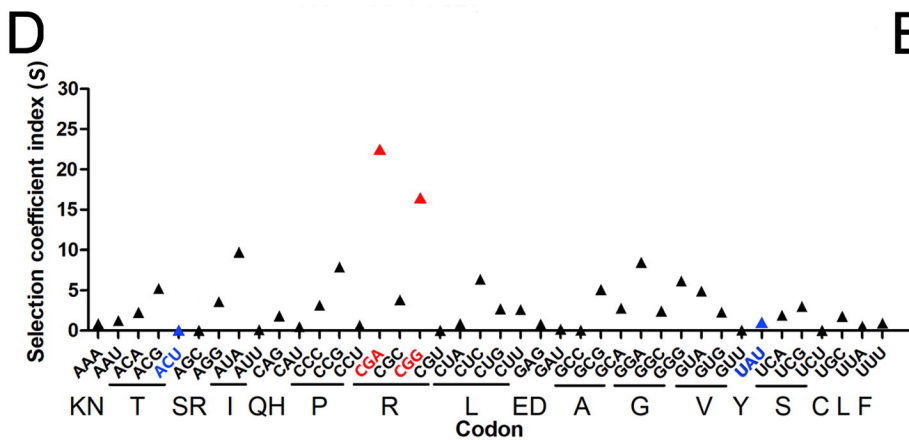

**C**

| Residues |   | SARS-COV-2 | SARS-COV |
|----------|---|------------|----------|
| Ala      | A | CCU        | GCU      |
| Cys      | C | UGU        | UGU      |
| Asp      | D | GAU        | GAU      |
| Glu      | E | GAA        | GAA      |
| Phe      | F | UUU        | UUU      |
| Gly      | G | GGU        | GGU      |
| His      | H | CAU        | CAU      |
| Ile      | I | AUU        | AUU      |
| Lys      | K | AAA        | AAA      |
| Leu      | L | UUU        | UUU      |
| Met      | M | AUG        | AUG      |
| Asn      | N | AAU        | AAU      |
| Pro      | P | CCU        | CCU      |
| Gln      | Q | CAA        | CAA      |
| Arg      | R | AGA        | AGA      |
| Ser      | S | UCU        | UCU      |
| Thr      | T | ACU        | ACU      |
| Val      | V | GUU        | GUU      |
| Trp      | W | UGG        | UGG      |
| Tyr      | Y | UAU        | UAU      |

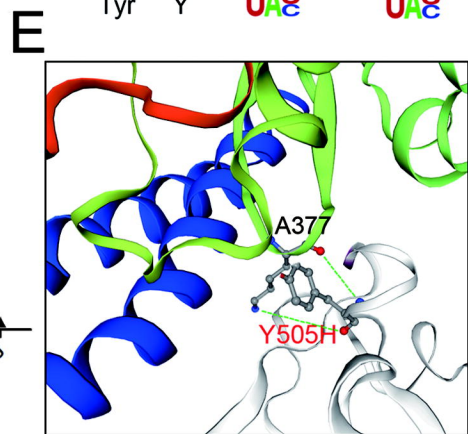

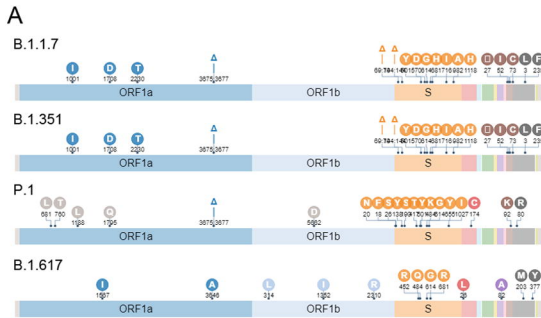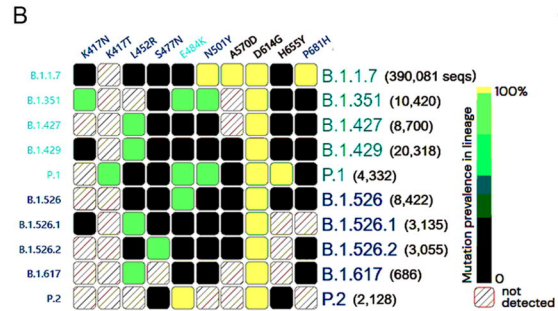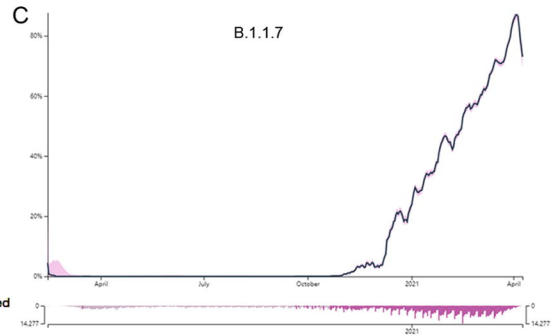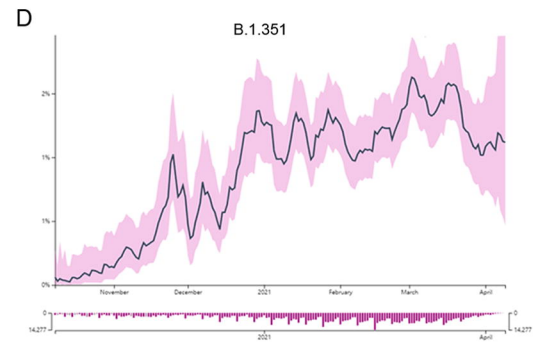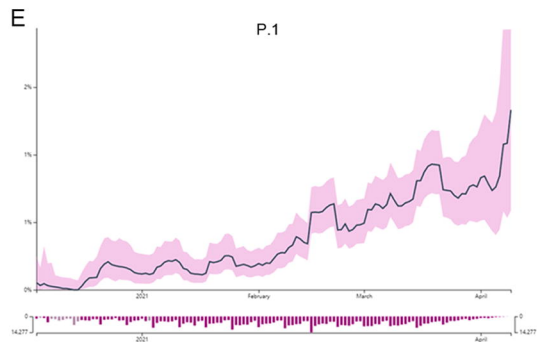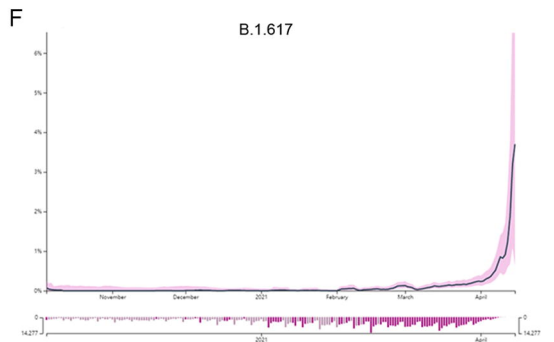

Source: https://www.biorxiv.org/content/10.1101/2021.04.04.438417v2.full.pdf
